# Supplementary material
Source: publisher figshare collection journal article supplement (https://frontiersin.figshare.com/ndownloader/files/13582772)
Supplement: Supplementary file [file 13582772]

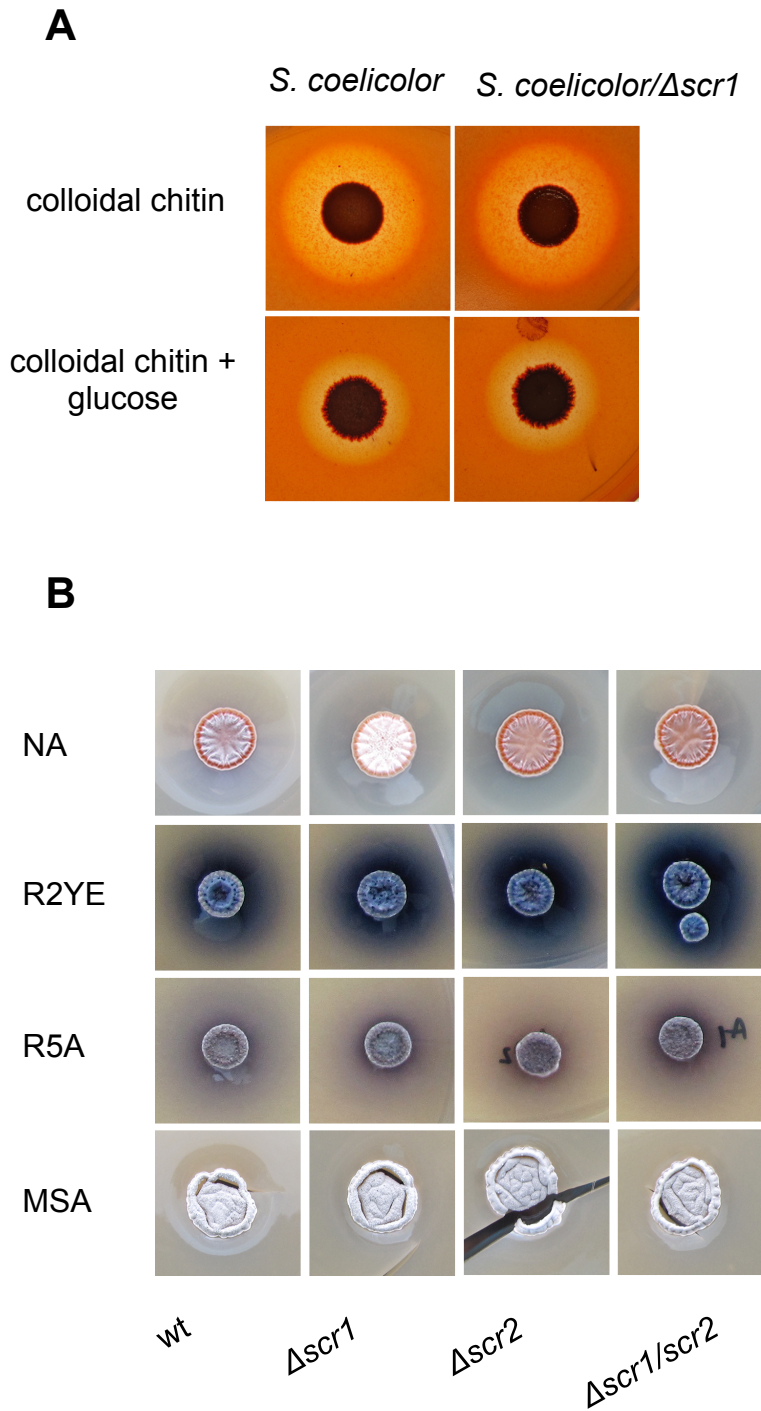

Figure S6: A) Chitinase production in *S. coelicolor* and in *S. coelicolor* Δ*scr1* in ISP4+0,15 % colloidal chitin without or with 1 % glucose. B) Antibiotic production of *S. coelicolor* strains in the indicated solid media after 7 days of culture.
